# Supplementary material for: The role of CO2 detachment in fungal bioluminescence: thermally vs. excited state induced pathways
Source: Royal Society of Chemistry journal article supplement (doi:10.1039/d0cp05037g), 2020-01-01
Supplement: d0cp05037g1.pdf [file d0cp05037g1.pdf]

## Electronic Supplementary Information

# The role of CO<sub>2</sub> detachment in fungal bioluminescence: thermally vs. excited state induced pathways.

*Cristina García-Iriepa*, <sup>\*[a,b,c]</sup> *Marco Marazzi*<sup>[b,c]</sup> and *Isabelle Navize*<sup>[a,d]</sup>

<sup>a</sup> Université Paris-Est, Laboratoire Modélisation et Simulation Multi Echelle, MSME UMR 8208, CNRS, UPEC, UPEM, F-77454, Marne-la-Vallée, France

<sup>b</sup> Departamento de Química Analítica, Química Física e Ingeniería Química, Universidad de Alcalá, E-28871 Alcalá de Henares, Madrid, Spain.

<sup>c</sup> Chemical Research Institute Andrés M. del Río (IQAR), Universidad de Alcalá, E-28871 Alcalá de Henares (Madrid), Spain

<sup>d</sup> MSME, Univ Gustave Eiffel, CNRS UMR 8208, Univ Paris Est Creteil, F-77454, Marne-la-Vallée, France

### Content

- 1. Charge distribution analysis.**
- 2. SOC computed values.**
- 3. Selected active spaces.**
- 4. ES-BL: Relaxed scan along the  $d_{O-O}$  coordinate**
- 5. CO<sub>2</sub> detachment in the excited state.**
- 6. Relaxed scan along the rotation coordinates.**
- 7. CI search for TH-BL computed path.**

## 1. Charge distribution analysis.

**Table S1.** Mulliken charges computed at the CASSCF(14,12) level of theory in  $S_0$  ( $S_1$ ) for the two oxygen atoms of the endoperoxide moiety for the ES-BL mechanism and peroxide for the TH-BL mechanism.

| Mec.  | Atoms          | HEI               | CI                | CI2               |
|-------|----------------|-------------------|-------------------|-------------------|
| ES-BL | O <sub>1</sub> | -0.2229 (-0.2201) | -0.2233 (-0.2328) | -0.2343 (-0.2369) |
|       | O <sub>2</sub> | -0.2292 (-0.2398) | -0.2305 (-0.2331) | -0.2447 (-0.2448) |
|       |                | Peroxide          | HECI2             | CI2               |
| TH-BL | O <sub>1</sub> | -0.2394 (-0.2806) | -0.3572 (-0.2628) | -0.3824 (-0.3998) |
|       | O <sub>2</sub> | -0.245 (-0.2723)  | -0.3479 (-0.303)  | -0.3502 (-0.2809) |

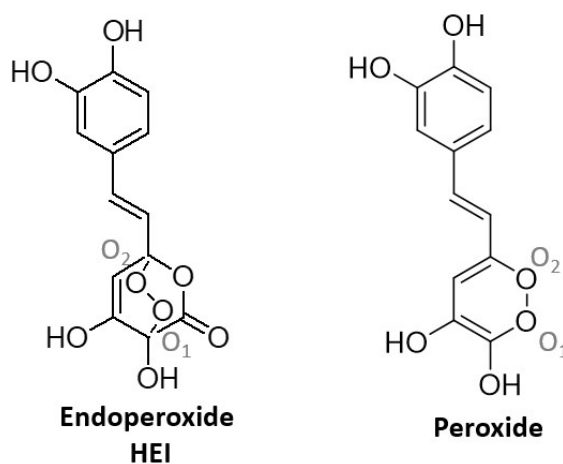

## 2. SOC computed values.

**Table S2.** Computed spin orbit couplings (SOC) between the singlet and triplet states for selected geometries of the ES-BL mechanism.

| State 1    | State 2    | HEI   | CI     | CI2    | TS <sub>co</sub> |
|------------|------------|-------|--------|--------|------------------|
| T1 (Ms=-1) | S0 (Ms=0)  | <20.0 |        | 38.827 |                  |
| T1 (Ms=1)  | S0 (Ms=0)  | <20.0 |        | 38.827 |                  |
| T1 (Ms=0)  | S0 (Ms=0)  | <20.0 | 55.665 | 22.693 |                  |
| T2 (Ms=-1) | S0 (Ms=0)  | <20.0 |        |        |                  |
| T2 (Ms=1)  | S0 (Ms=0)  | <20.0 |        |        |                  |
| T2 (Ms=0)  | S0 (Ms=0)  | <20.0 |        |        | 66.297           |
| T1 (Ms=0)  | S1 (Ms=0)  | <20.0 | 28.618 |        | 63.374           |
| T2 (Ms=-1) | S1 (Ms=0)  | <20.0 | 21.256 | 43.422 |                  |
| T2 (Ms=1)  | S1 (Ms=0)  | <20.0 | 21.256 | 43.422 |                  |
| T2 (Ms=0)  | S1 (Ms=0)  | <20.0 | 59.976 | 25.113 |                  |
| T2 (Ms=-1) | T1 (Ms=-1) | <20.0 | 65.587 | 25.095 | 70.697           |
| T2 (Ms=0)  | T1 (Ms=-1) | <20.0 | 23.563 | 43.471 |                  |
| T2 (Ms=-1) | T1 (Ms=0)  | <20.0 | 23.563 | 43.471 |                  |
| T2 (Ms=1)  | T1 (Ms=0)  | <20.0 | 23.563 | 43.471 |                  |
| T2 (Ms=0)  | T1 (Ms=1)  | <20.0 | 23.563 | 43.471 |                  |
| T2 (Ms=1)  | T1 (Ms=1)  | <20.0 | 65.587 | 25.095 | 70.697           |

**Table S3.** Computed spin orbit couplings (SOC) between the singlet and triplet states for selected geometries of the TH-BL mechanism.

| State 1    | State 2    | CI2    | Min S <sub>1</sub> |
|------------|------------|--------|--------------------|
| T1 (Ms=-1) | S0 (Ms=0)  | 38.827 | 45.948             |
| T1 (Ms=1)  | S0 (Ms=0)  | 38.827 | 45.948             |
| T1 (Ms=0)  | S0 (Ms=0)  | 22.693 | <20.0              |
| T2 (Ms=-1) | S0 (Ms=0)  | <20.0  | <20.0              |
| T2 (Ms=1)  | S0 (Ms=0)  | <20.0  | <20.0              |
| T2 (Ms=0)  | S0 (Ms=0)  | <20.0  | <20.0              |
| T1 (Ms=0)  | S1 (Ms=0)  | <20.0  | <20.0              |
| T2 (Ms=-1) | S1 (Ms=0)  | 43.422 | 44.566             |
| T2 (Ms=1)  | S1 (Ms=0)  | 43.422 | 44.566             |
| T2 (Ms=0)  | S1 (Ms=0)  | 25.113 | <20.0              |
| T2 (Ms=-1) | T1 (Ms=-1) | 25.095 | <20.0              |
| T2 (Ms=0)  | T1 (Ms=-1) | 43.471 | 43.849             |
| T2 (Ms=-1) | T1 (Ms=0)  | 43.471 | 43.849             |
| T2 (Ms=1)  | T1 (Ms=0)  | 43.471 | 43.849             |
| T2 (Ms=0)  | T1 (Ms=1)  | 43.471 | 43.849             |
| T2 (Ms=1)  | T1 (Ms=1)  | 25.095 | <20.0              |

### 3. Selected active spaces.

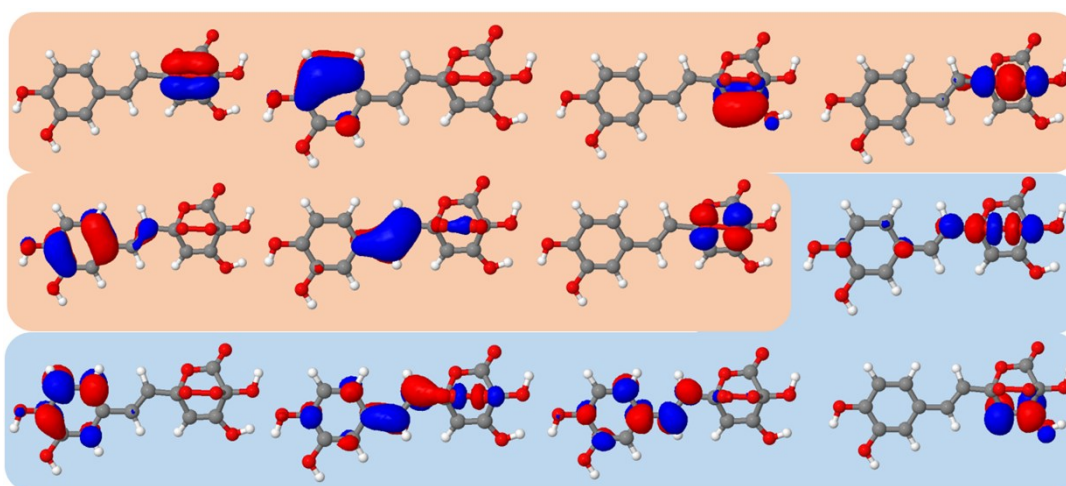

**Figure S1.** Active space selected for the Endoperoxide HEI for computing the ES-BL mechanism (bonding orbitals in red and antibonding in blue).

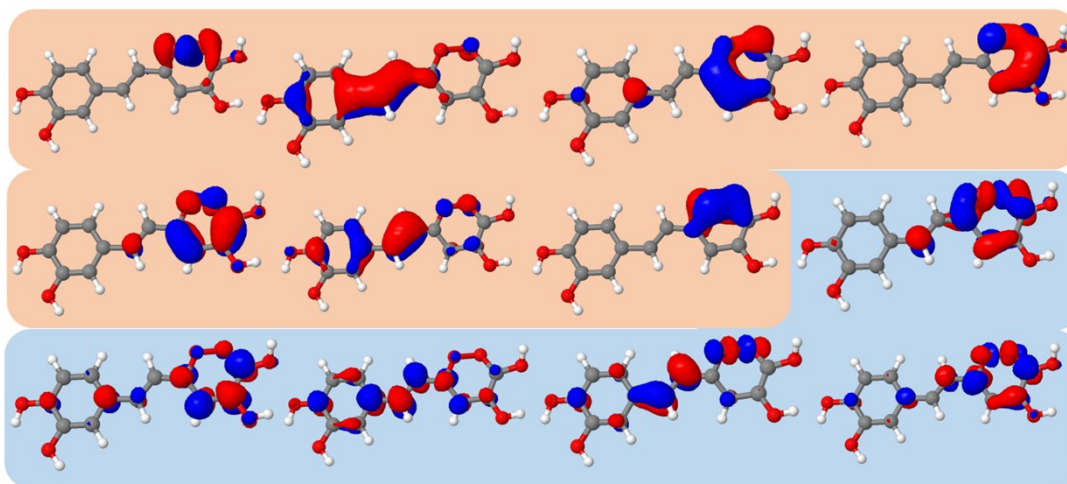

**Figure S2.** Active space selected for the peroxide intermediate computing the second step of the TH-BL mechanism (bonding orbitals in red and antibonding in blue).

#### 4. ES-BL: Relaxed scan along the $d_{O-O}$ coordinate

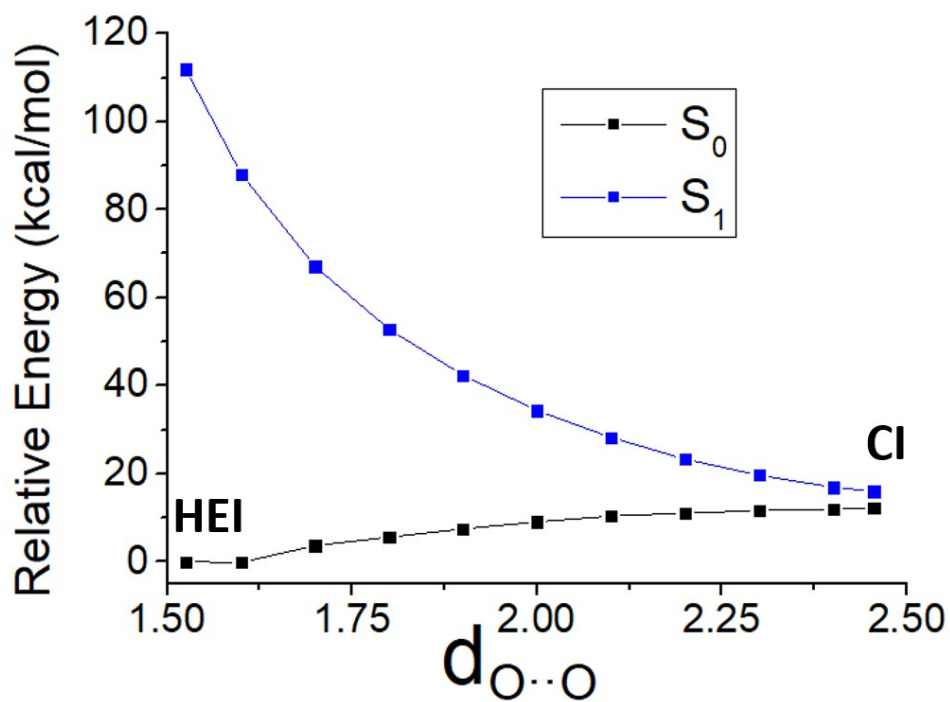

**Figure S3.** Relaxed scan along the peroxide O-O bond in the ES-BL path from Endoperoxide HEI to Open Endoperoxide at the CASSCF (14,12) level of theory.

## 5. CO<sub>2</sub> detachment in the excited state.

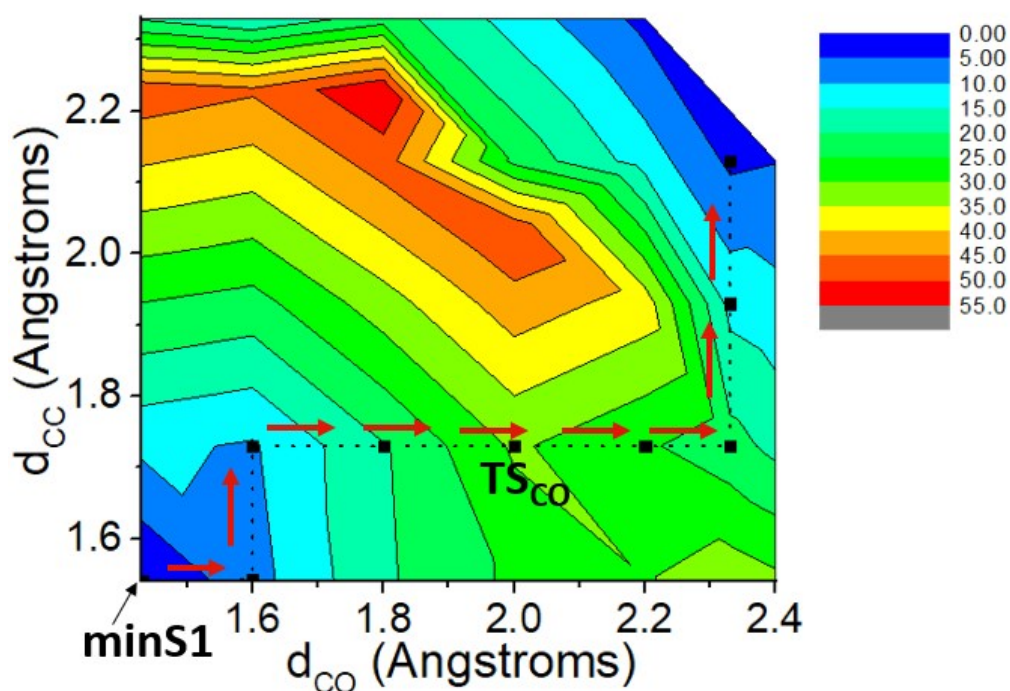

**Figure S4.** Graph of the double scan performed along the dissociation of the CO bond ( $d_{CO}$ ) and dissociation of the CC bond ( $d_{CC}$ ) coordinates to evaluate the energy barriers of the CO<sub>2</sub> release in  $S_1$ . The data were computed at the CASSCF(14,12) level of theory.

## 6. Relaxed scan along the rotation coordinates.

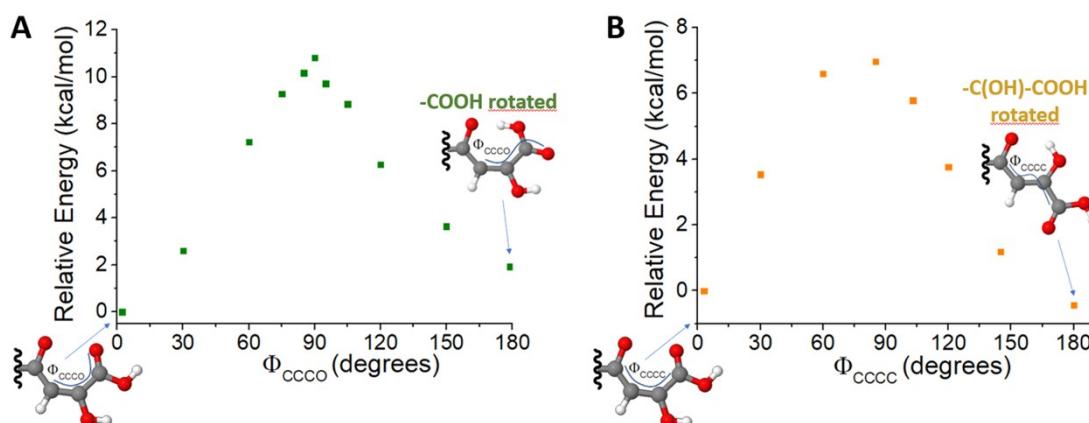

**Figure S5.** Relaxed scans performed along the torsion coordinate to evaluate the energy barriers for the rotations of Excited Oxyluciferin in its minimum in  $S_1$  at the CASPT2//CASSCF level.

## 7. CI search for TH-BL computed path.

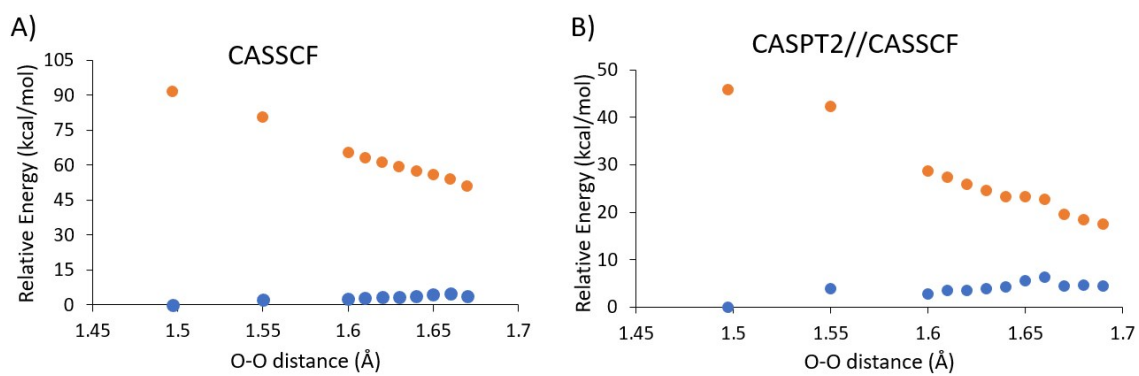

**Figure S6.** A) Scan performed along the peroxide O-O bond elongation at the CASSCF level. B) CASPT2 single point energy calculations on top of the CASSCF geometries.
